# Supplementary material for: Systematic comparison and reconstruction of sea urchin (Echinoidea) internal anatomy: a novel approach using magnetic resonance imaging
Source: PubMed Central journal article supplement (PMC2500006; doi:10.1186/1741-7007-6-33), 2008-07-23
Supplement: 1741-7007-6-33-S1.pdf [file 1741-7007-6-33-S1.pdf]

**Table 1 - Scanning parameters for specimens used in this study.**

| Specimen                                                        | Scanning location | Scanning solution                   | Spatial resolution            | Field of view (FOV)         | Matrix size in pixel | Echo time ( $T_E$ ) | Repetition time ( $T_R$ ) | Average number | Scanning time | Figure in this study  |
|-----------------------------------------------------------------|-------------------|-------------------------------------|-------------------------------|-----------------------------|----------------------|---------------------|---------------------------|----------------|---------------|-----------------------|
| <i>Eucidaris metularia</i> (NHM)                                | Berlin (7 T)      | H <sub>2</sub> O dest. + Magnevist  | (81 $\mu$ m) <sup>3</sup>     | (3.12 cm) <sup>3</sup>      | (384) <sup>3</sup>   | 6.7 ms              | 30 ms                     | 12             | 15 h          | 2A, 3, 6A-C, 3D model |
| <i>Caenopedina mirabilis</i> (USNM)                             | Berlin (7 T)      | H <sub>2</sub> O dest. + Magnevist  | (81 $\mu$ m) <sup>3</sup>     | (3.12 cm) <sup>3</sup>      | (384) <sup>3</sup>   | 6.7 ms              | 30 ms                     | 12             | 15 h          | 3                     |
| <i>Diadema savignyi</i> (Aquarium store)                        | Würzburg (17.6 T) | Formalin + Magnevist                | (40 $\mu$ m) <sup>3</sup>     | 1.7x1.7x1.4 cm <sup>3</sup> | 420x420x348          | 2.84 ms             | 20 ms                     | 22             | 18 h          | 3                     |
| <i>Salenocidaris</i> (= <i>Salenia</i> ) <i>hastigera</i> (ZMB) | Berlin (7 T)      | H <sub>2</sub> O dest. + Magnevist  | (81 $\mu$ m) <sup>3</sup>     | (3.12 cm) <sup>3</sup>      | (384) <sup>3</sup>   | 6.7 ms              | 30 ms                     | 12             | 15 h          | 3                     |
| <i>Arbacia lixula</i> (= var. <i>africana</i> ) (NHM)           | Würzburg (17.6 T) | H <sub>2</sub> O dest. + Magnevist  | (44 $\mu$ m) <sup>3</sup>     | 1.7x1.5x1.7 cm <sup>3</sup> | 384x340x384          | 2.57 ms             | 20 ms                     | 36             | 26 h          | 3                     |
| <i>Stomopneustes variolaris</i> (USNM)                          | Berlin (7 T)      | H <sub>2</sub> O dest. + Magnevist  | (81 $\mu$ m) <sup>3</sup>     | (3.12 cm) <sup>3</sup>      | (384) <sup>3</sup>   | 6.7 ms              | 30 ms                     | 12             | 15 h          | 3                     |
| <i>Psammechinus miliaris</i> (BAH)                              | Berlin (7 T)      | H <sub>2</sub> O dest. + Magnevist  | (81 $\mu$ m) <sup>3</sup>     | (3.12 cm) <sup>3</sup>      | (384) <sup>3</sup>   | 6.7 ms              | 30 ms                     | 12             | 15 h          | 1A-E                  |
|                                                                 | Würzburg (17.6 T) | Formalin + Magnevist                | (44 $\mu$ m) <sup>3</sup>     | 1.7x1.4x1.7 cm <sup>3</sup> | 384x320x384          | 2.97 ms             | 20 ms                     | 22             | 15 h          | 2B                    |
| <i>Psammechinus miliaris</i> (ZMB)                              | Berlin (7 T)      | H <sub>2</sub> O dest. + Magnevist  | (81 $\mu$ m) <sup>3</sup>     | (3.12 cm) <sup>3</sup>      | (384) <sup>3</sup>   | 6.7 ms              | 30 ms                     | 12             | 15 h          | 1F                    |
| <i>Strongylocentrotus purpuratus</i> (CAS)                      | Berlin (7 T)      | H <sub>2</sub> O dest. + Magnevist  | (81 $\mu$ m) <sup>3</sup>     | (3.12 cm) <sup>3</sup>      | (384) <sup>3</sup>   | 6.7 ms              | 30 ms                     | 12             | 15 h          | 3                     |
| <i>Mespilia globulus</i> (ZMB)                                  | Würzburg (17.6 T) | H <sub>2</sub> O dest. + Magnevist  | (36 $\mu$ m) <sup>3</sup>     | (1.4 cm) <sup>3</sup>       | (384) <sup>3</sup>   | 2.65 ms             | 20 ms                     | 40             | 33 h          | 3                     |
| <i>Echinoneus cyclostomus</i> (NHM)                             | Berlin (7 T)      | H <sub>2</sub> O dest. + Magnevist  | (86 $\mu$ m) <sup>3</sup>     | (3.12 cm) <sup>3</sup>      | (384) <sup>3</sup>   | 6.7 ms              | 30 ms                     | 12             | 15 h          | 2C, 4, 5A             |
| <i>Echinolampas depressa</i> (USNM)                             | Berlin (7 T)      | H <sub>2</sub> O dest. + Magnevist  | (81 $\mu$ m) <sup>3</sup>     | (3.12 cm) <sup>3</sup>      | (384) <sup>3</sup>   | 6.7 ms              | 30 ms                     | 12             | 15 h          | 4, 5B                 |
| <i>Echinocyamus pusillus</i> (BAH)                              | Würzburg (17.6 T) | Formalin + Magnevist                | 20x18x18 $\mu$ m <sup>3</sup> | 5.0x4.5x4.5mm <sup>3</sup>  | (256) <sup>3</sup>   | 3.27 ms             | 20 ms                     | 32             | 12 h          | 2D, 4                 |
| <i>Pourtalesia wandeli</i> (NHM)                                | Berlin (7 T)      | H <sub>2</sub> O dest. + Magnevist® | (86 $\mu$ m) <sup>3</sup>     | (3.3 cm) <sup>3</sup>       | (384) <sup>3</sup>   | 6.7 ms              | 30 ms                     | 12             | 15 h          | 4, 5C                 |
| <i>Abatus</i> (= <i>Hemiaster</i> ) <i>cavernosus</i> (ZMB)     | Berlin (7 T)      | H <sub>2</sub> O dest. + Magnevist  | (81 $\mu$ m) <sup>3</sup>     | (3.12 cm) <sup>3</sup>      | (384) <sup>3</sup>   | 6.7 ms              | 30 ms                     | 12             | 15 h          | 4, 5D                 |
