# Supplementary material for: Systematic comparison and reconstruction of sea urchin (Echinoidea) internal anatomy: a novel approach using magnetic resonance imaging
Source: PubMed Central journal article supplement (PMC2500006; doi:10.1186/1741-7007-6-33), 2008-07-23
Supplement: 1741-7007-6-33-S2.pdf [file 1741-7007-6-33-S2.pdf]

**Table 2 - List of specimens used in this study.**

| Specimen                                                                  | Specimen ID            | Source         | Locality                             | Year collected | Collected by                    | Identified by                | Diameter without spines | Figure in this study  |
|---------------------------------------------------------------------------|------------------------|----------------|--------------------------------------|----------------|---------------------------------|------------------------------|-------------------------|-----------------------|
| <i>Eucidaris metularia</i> (Lamarck, 1816)                                | 1969.5.1.15-40         | NHM            | Aldabra, Indian Ocean                | 1969           | J.D. Taylor                     | Unknown                      | 2.0 cm                  | 2A, 3, 6A-C, 3D model |
| <i>Caenopedina mirabilis</i> (Döderlein, 1885)                            | 31182                  | USNM           | Kii Strait, Pacific Ocean            | 1906           | Northwestern Pacific Expedition | H.L. Clark                   | 1.5 cm                  | 3                     |
| <i>Diadema savignyi</i> Michelin, 1845                                    | n/a, one specimen      | Aquarium store | Red Sea, Indian Ocean                | 2006           | Seewasser Center Berlin         | A. Ziegler                   | 1.9 cm                  | 3                     |
| <i>Salenocidaris</i> (= <i>Salenia</i> ) <i>hastigera</i> (Agassiz, 1869) | 5816                   | ZMB            | Maldives, Indian Ocean               | 1898           | Valdivia Expedition             | Unknown                      | 1.5 cm                  | 3                     |
| <i>Arbacia lixula</i> (= var. <i>africana</i> ) (Linnaeus, 1758)          | 1952.3.26.31-36        | NHM            | Ghana, Atlantic Ocean                | 1949           | R. Bassindale                   | Unknown                      | 1.8 cm                  | 3                     |
| <i>Stomopneustes variolaris</i> (Lamarck, 1816)                           | E45930                 | USNM           | Greater Sunda Islands, Indian Ocean  | 1963           | L. Kelts                        | C. Ahearn                    | 2.2 cm                  | 3                     |
| <i>Psammechinus miliaris</i> (Müller, 1771)                               | n/a, several specimens | BAH            | Helgoland, North Sea                 | 2006           | BAH                             | BAH                          | 1.5-2.5 cm              | 1A-E, 2B              |
| <i>Psammechinus miliaris</i> (Müller, 1771)                               | 2011                   | ZMB            | Arendal, Baltic Sea                  | 1872           | Pommerania Expedition           | Unknown                      | 1.7 cm                  | 1F                    |
| <i>Strongylocentrotus purpuratus</i> (Stimpson, 1857)                     | 5724                   | CAS            | Morro Bay, Pacific Ocean             | 1972           | J.T. Carlton et al.             | J.T. Carlton et al.          | 2.3 cm                  | 3                     |
| <i>Mespilia globulus</i> (Linnaeus, 1758)                                 | 5620                   | ZMB            | Madang, Pacific Ocean                | 1909           | S. Schöde                       | Unknown                      | 1.3 cm                  | 3                     |
| <i>Echinoneus cyclostomus</i> Leske, 1778                                 | 1969.5.1.105           | NHM            | Aldabra, Indian Ocean                | 1969           | J.D. Taylor                     | Unknown                      | Length: 3.4 cm          | 2C, 4, 5A             |
| <i>Echinolampas depressa</i> Gray, 1851                                   | E32955                 | USNM           | Florida, Gulf of Mexico              | 1981           | Continental Shelf Associates    | Continental Shelf Associates | Length: 2.8 cm          | 4, 5B                 |
| <i>Echinocyamus pusillus</i> (Müller, 1776)                               | n/a, one specimen      | BAH            | Helgoland, North Sea                 | 2006           | BAH                             | BAH                          | Length: 5.0 mm          | 2D, 4                 |
| <i>Pourtalesia wandeli</i> Mortensen, 1905                                | 1976.7.30.76-95        | NHM            | 300 mls S of Iceland, Atlantic Ocean | 1976           | Discovery Expedition            | Unknown                      | Length: 3.3 cm          | 4, 5C                 |
| <i>Abatus</i> (= <i>Hemiaster</i> ) <i>cavernosus</i> (Philippi, 1845)    | 5854                   | ZMB            | Kerguelles, Indian Ocean             | 1898           | Valdivia Expedition             | Unknown                      | Length: 2.8 cm          | 4, 5D                 |
